# Supplementary material for: Hyaluronic Acid Binding to TLR4 Promotes Proliferation and Blocks Apoptosis in Colon Cancer
Source: Oxford University Press journal article supplement (doi:10.1158/1535-7163.mct-18-1225), 2019-09-04
Supplement: 15357163mct181225-sup-211177_3_supp_5725422_pwld7r.docx [file 15357163mct181225-sup-211177_3_supp_5725422_pwld7r.docx]

**
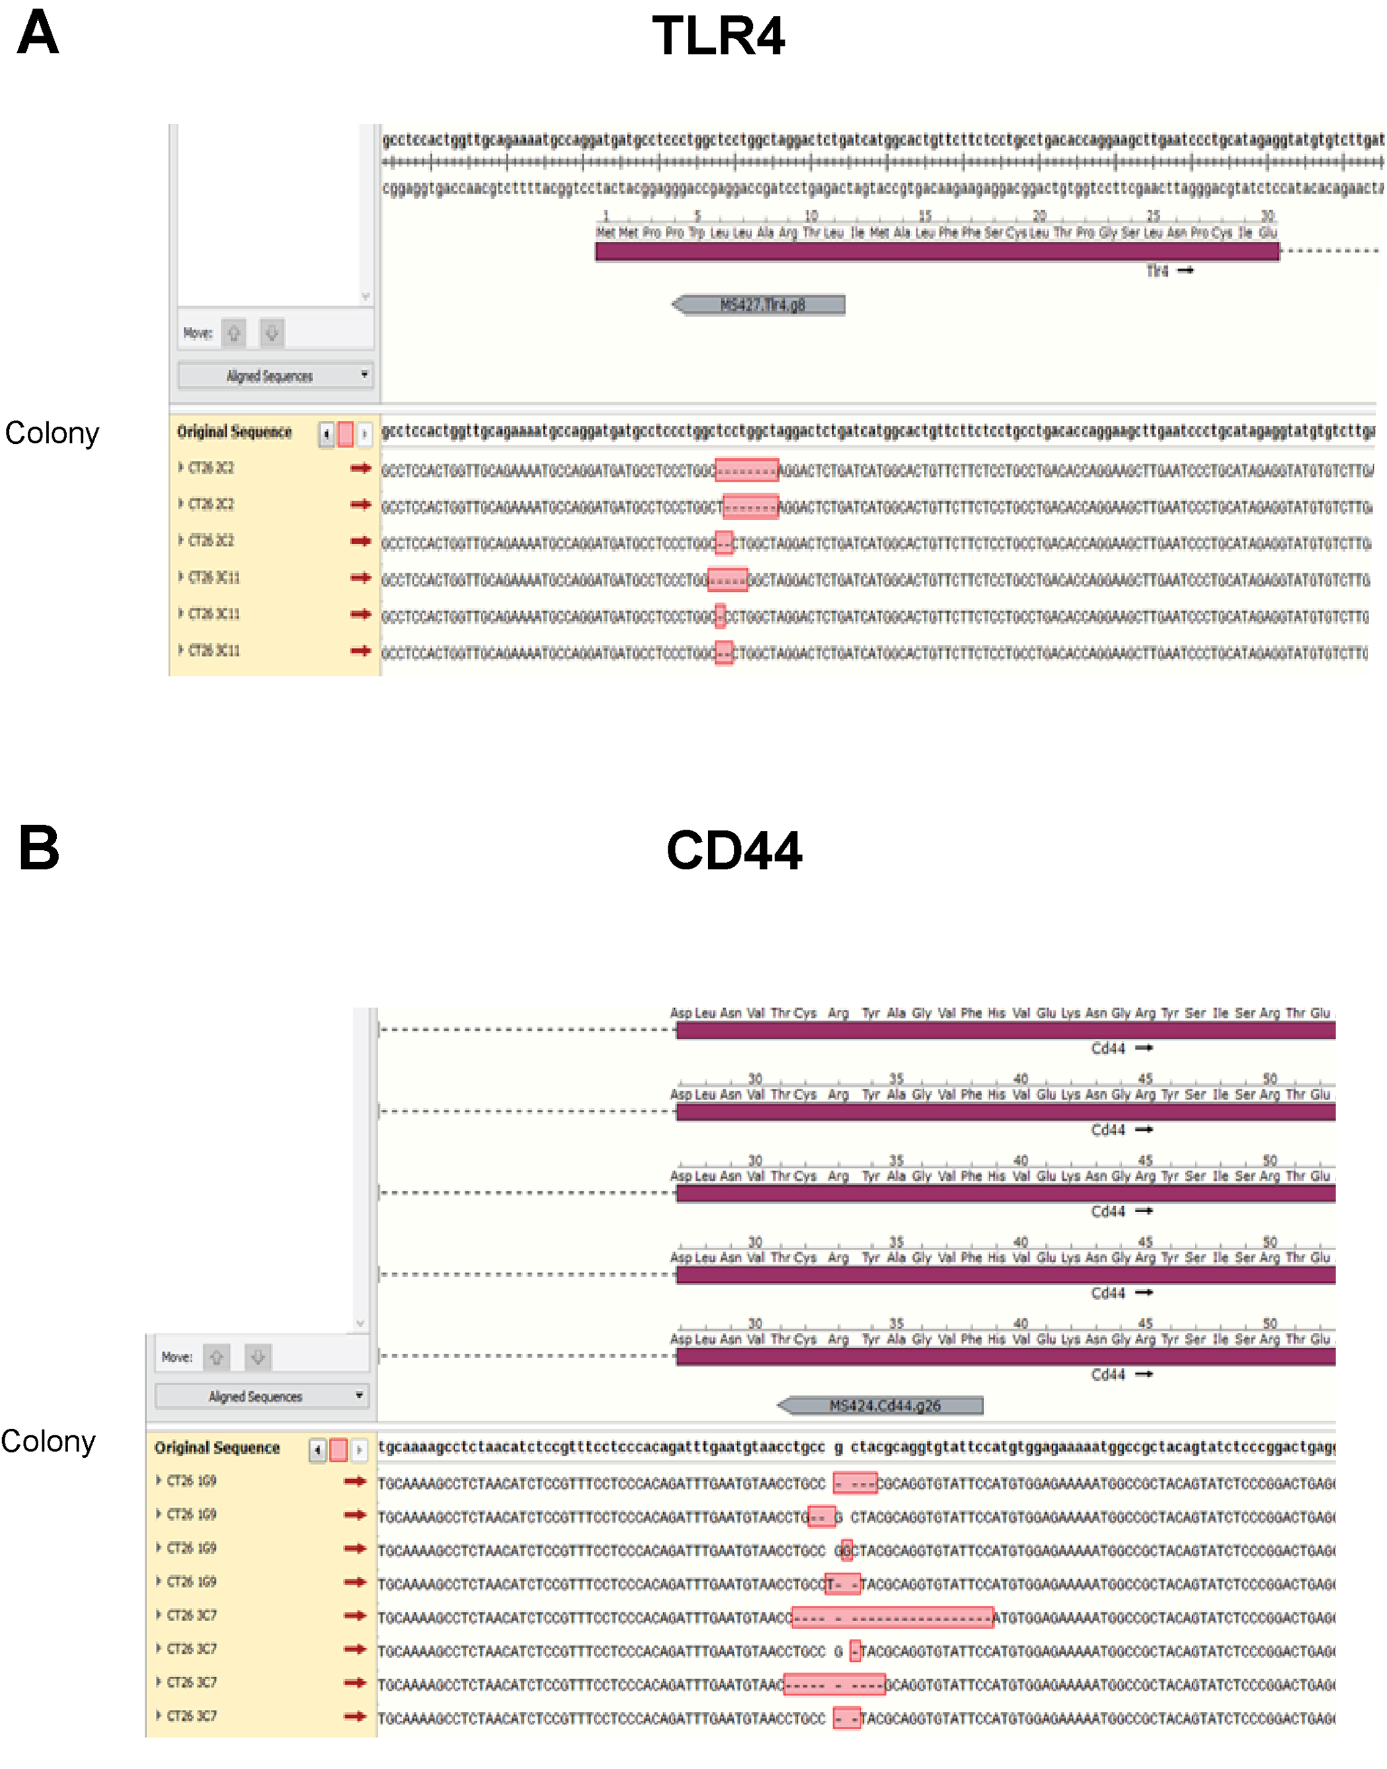
Supplementary Fig.1** Deep sequencing of the TLR4 CRISPR and CD44 CRISPR colonies. In WT CT26 cells there are three alleles of TLR4 and four alleles of CD44. Two colonies of each CRISPR cell line, TLR4 CRISPR 2c2 and 3c11, and CD44 CRISPR 1G9 and 3C7, were selected for further experiments.

**
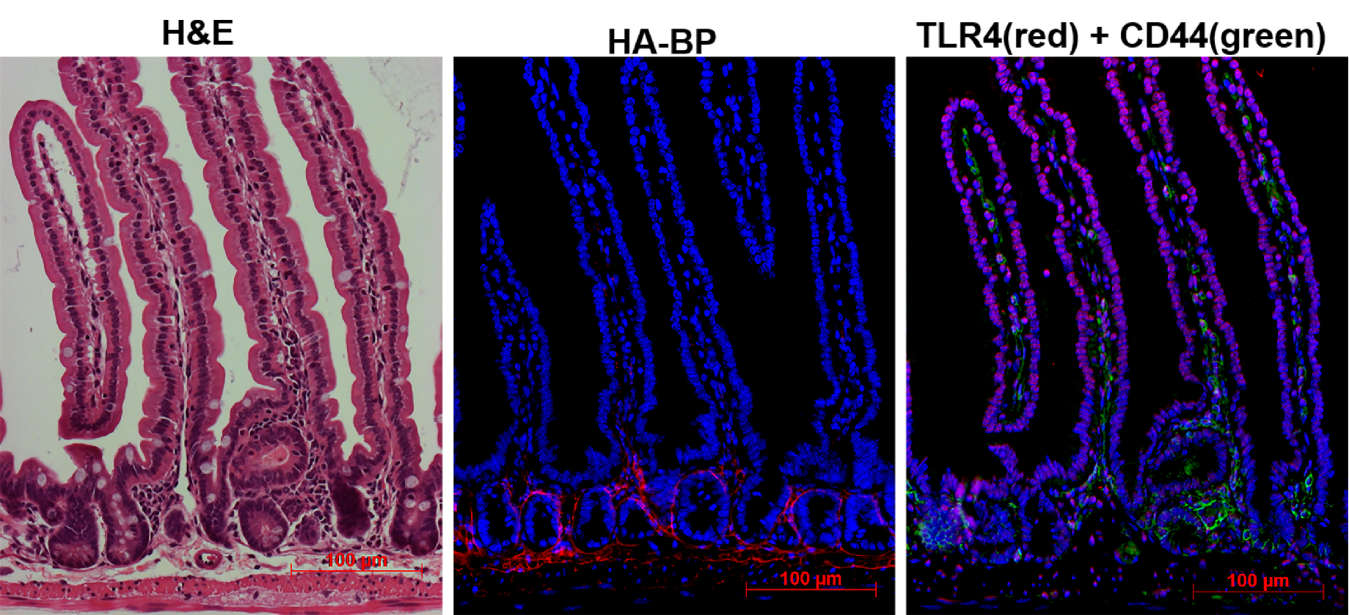
**

**Supplementary Fig.2** Photomicrographs show that the distributions of HA, TLR4, and CD44 in non-adenomatous areas of the APCmin/+ intestines were similar to that in wild type mice. TLR4 and CD44 were found in lamina propria cells in villi and around the crypts. TLR4 was also found in epithelial cells in villi and crypts, whereas CD44 epithelial expression was primarily in the base of the crypts.

**
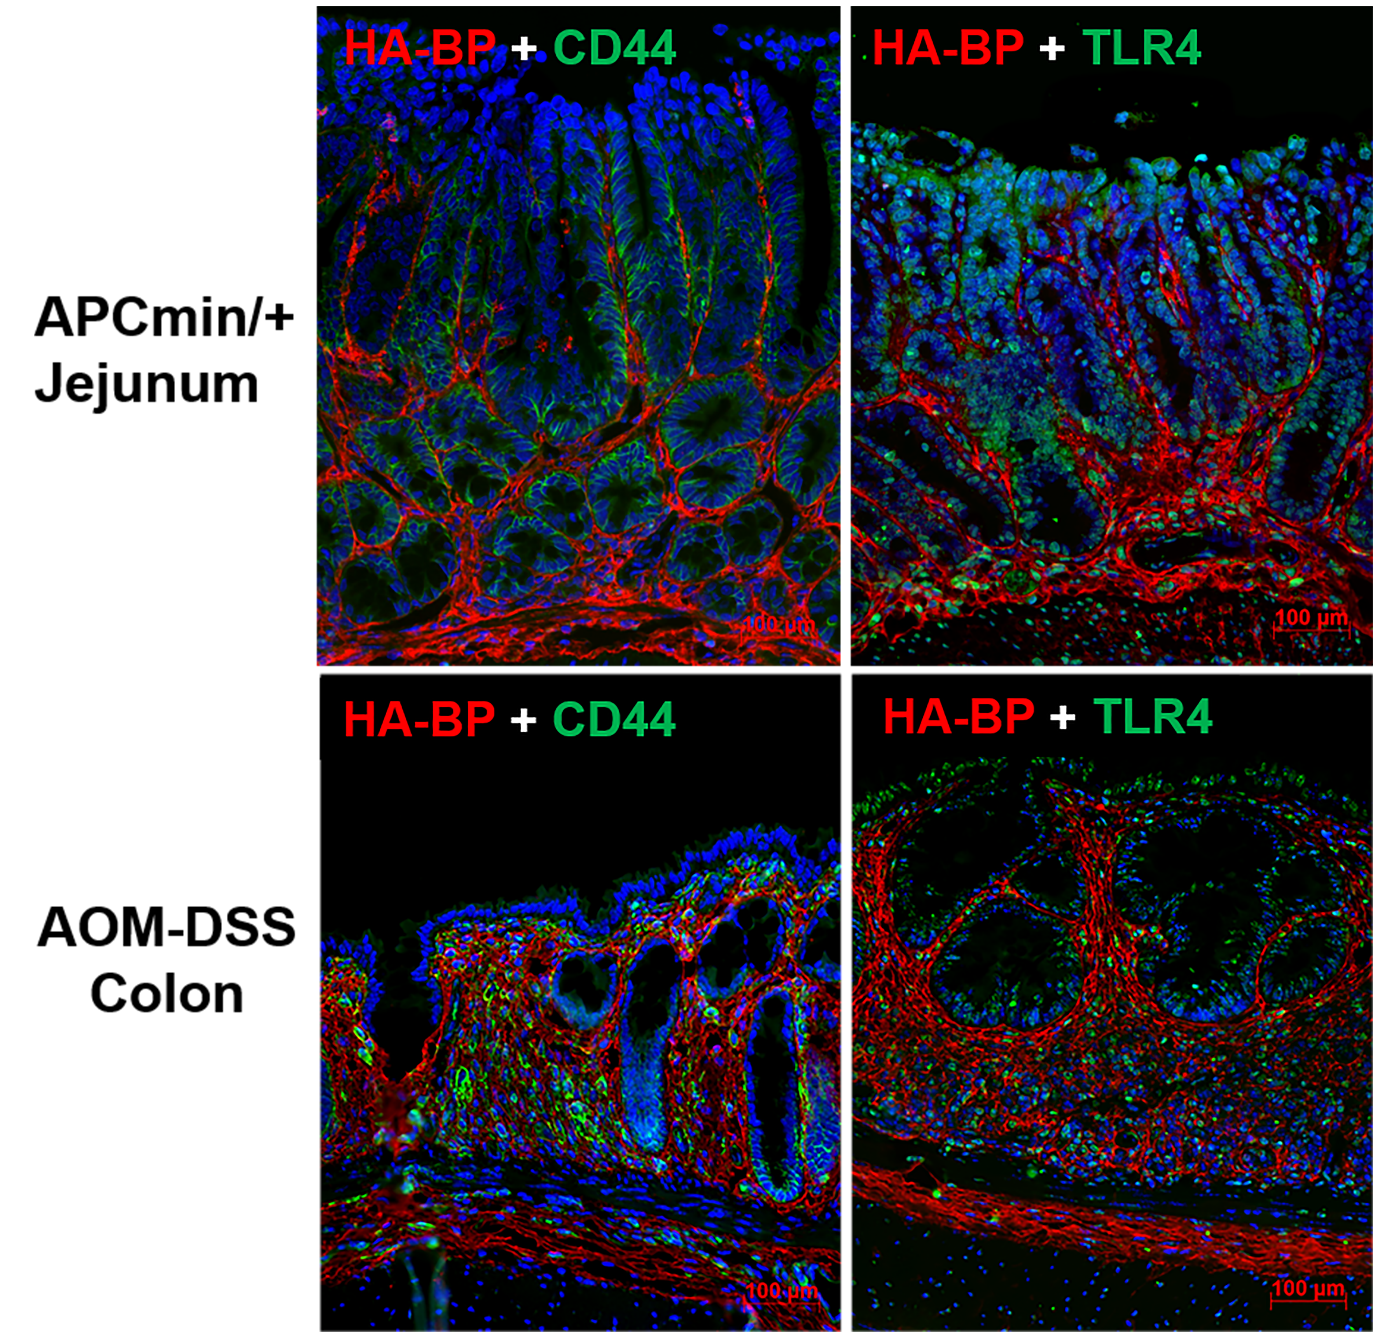
**

**Supplementary Fig.3** Immunofluorescence for hyaluronic acid binding protein (HA-BP, red) illustrates the close association between hyaluronic acid (red) with CD44 (green) and TLR4 (green) in adenomas in both WT AOM-DSS mouse colon and in APCmin/+ mouse small intestine.

**
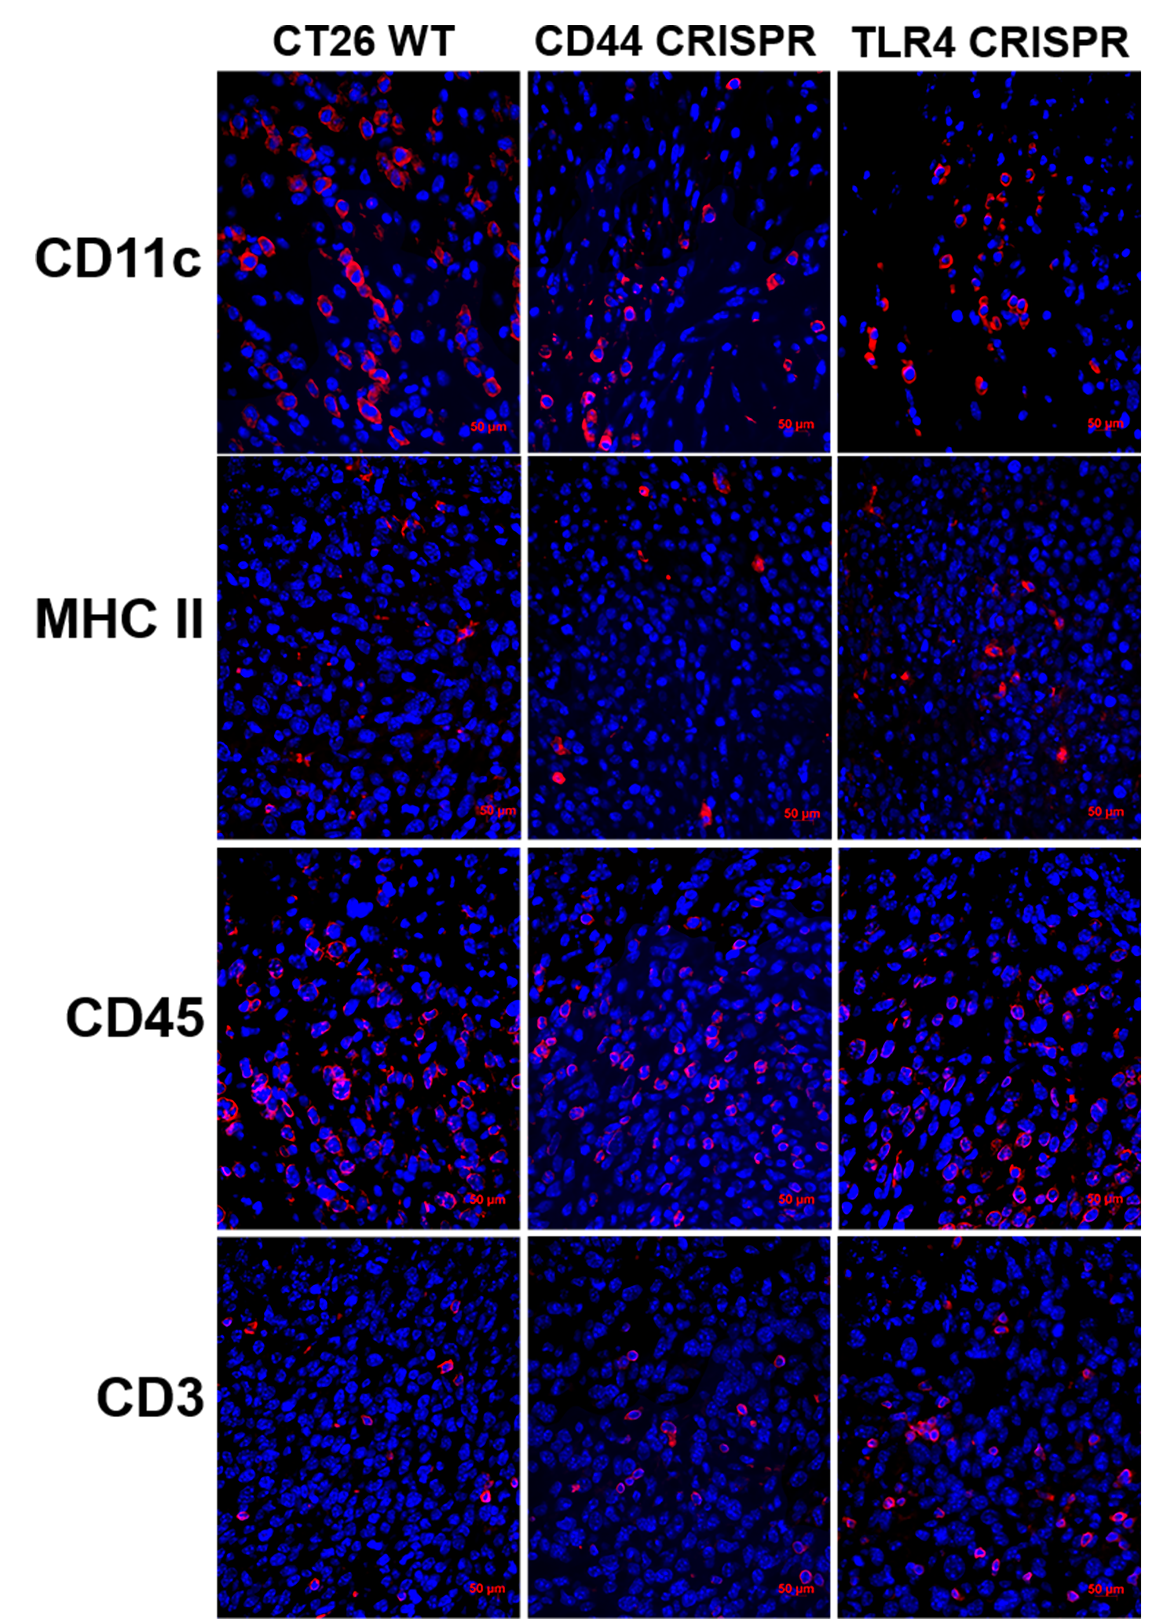
**

**Supplementary Fig.4** Immunofluorescence for lymphocyte markers in CT26 WT, CD44 CRISPR and TLR4 CRISPR tumor sections. There was no difference in the abundance of markers for dendritic cells and macrophage (CD11c, MHC II) or T-cells and B-cells (CD45, CD3) in the three tumor types. Primary antibodies were rat anti-MHC II for BalbC mice (BD Pharmingen 553621), mouse anti-CD11c (Santa Cruz sc398707), rabbit anti-CD45 (Abcam ab10558), and rabbit anti-CD3 (Abcam ab 16669).
